# Supplementary material for: The Anemia Stress Index—Anemia, Transfusions, and Mortality in Patients with Continuous Flow Ventricular Assist Devices
Source: MDPI journal article supplement (doi:10.3390/jcm11154517), 2022-08-03
Supplement: s1 [file s1]

Supplemental Table S1: Results of Cox Regression model examining association between ASI at 24 hours post LVAD implant and time to mortality

| Variable                                       | HR (95% CI)        |
|------------------------------------------------|--------------------|
| ASI at 24 hours                                | 1.08 (1.03 – 1.14) |
| Age at Implant, per year increase              | 1.03 (1.00-1.05)   |
| Male Sex                                       | 0.78 (0.37-1.63)   |
| Pre-Implant Body Mass Index, per unit increase | 1.07 (1.02-1.12)   |
| Diabetes Mellitus                              | 0.62 (0.35-1.09)   |
| Chronic Obstructive Pulmonary Disease          | 1.04 (0.57-1.97)   |
| History of smoking                             | 1.50 (0.85-2.67)   |
| Atrial fibrillation                            | 0.77 (0.44-1.34)   |
| Pre-Implant Chronic Kidney Disease             | 2.21 (1.27-3.85)   |
| Previous sternotomy                            | 0.63 (0.36-1.10)   |
| Indication for LVAD Implantation               |                    |
| Bridge to Transplant                           | Reference          |
| Destination Therapy                            | 2.44 (0.93-6.42)   |
| Bridge to Decision                             | 0.70 (0.64-2.53)   |
| Bridge to Recovery                             | _*                 |
| Type of LVAD implanted                         |                    |
| HM2                                            | Reference          |
| HM3                                            | 3.03 (1.26-7.29)   |

\* estimate not calculated due to very small number of patients.
